# Supplementary material for: Backbone Free Energy Estimator Applied to Viral Glycoproteins
Source: PubMed Central journal article supplement — J Comput Biol. 2020 Oct 13;27(10):1495–508. doi: 10.1089/cmb.2020.0120 (PMC7591380; doi:10.1089/cmb.2020.0120), 2020-10-13
Supplement: Supp_Table1.pdf [file Supp_Table1.pdf]

## Supplementary Data

SUPPLEMENTARY TABLE S1. ALIGNED PRE/POSTFUSION INFLUENZA HA CHAIN F

| <i>Residue</i> | $\phi_{\text{pre}}$ | $\psi_{\text{pre}}$ | $\phi_{\text{post}}$ | $\psi_{\text{post}}$ | $\Delta\phi$ | $\Delta\psi$ | $\Pi_{\text{pre}}$ | $\Pi_{\text{post}}$ |
|----------------|---------------------|---------------------|----------------------|----------------------|--------------|--------------|--------------------|---------------------|
| 40             | -69                 | -34.4               | -69                  | -71.6                | 0            | 37.2         | 0.85               | 9.85                |
| 41             | -60.2               | -42.2               | -39.4                | -53.7                | 20.8         | 11.5         | 4.18               | 0.7                 |
| 42             | -68                 | -43.9               | -59                  | -38                  | 9            | 5.9          | 2.73               | 2.15                |
| 43             | -53.7               | -47.9               | -74.6                | -32.2                | 20.9         | 15.7         | 3.34               | 3.26                |
| 44             | -63.2               | -49.3               | -60.9                | -53.9                | 2.3          | 4.6          | 1.46               | 9.85                |
| 45             | -62.4               | -44                 | -61.8                | -29.4                | 0.6          | 14.6         | 0.85               | 9.02                |
| 46             | -59.3               | -48                 | -73.6                | -31.4                | 14.3         | 16.6         | 4.18               | 1.56                |
| 47             | -57.1               | -44.1               | -71.3                | -46.1                | 14.2         | 2            | 2.73               | 3.41                |
| 48             | -66.5               | -36.9               | -54                  | -58.3                | 12.5         | 21.4         | 3.34               | 4.77                |
| 49             | -68.5               | -34                 | -63                  | -30.9                | 5.5          | 3.1          | 4.06               | 3.63                |
| 50             | -62.3               | -50.5               | -76.5                | -22.1                | 14.2         | 28.4         | 0.68               | 9.02                |
| 51             | -67.3               | -37.6               | -82.7                | -43.3                | 15.4         | 5.7          | 2.43               | 2.73                |
| 52             | -59                 | -42.2               | -59                  | -37.3                | 0            | 4.9          | 1.28               | 9.85                |
| 53             | -69.7               | -36.6               | -78.8                | -18.6                | 9.1          | 18           | 2.3                | 3.09                |
| 54             | -64.5               | -35.3               | -71.1                | -37.7                | 6.6          | 2.4          | 6.87               | 4.83                |
| 55             | -70.6               | -38.4               | -69.3                | -66                  | 1.3          | 27.6         | 0.39               | 5.1                 |
| 56             | -86.1               | 10.8                | -44.7                | -44.3                | 41.4         | 55.1         | 1.56               | 8.35                |
| 57             | -62.5               | -163.4              | -61.9                | -49.6                | 0.6          | 113.8        | 0.39               | 9.85                |
| 58             | -57.1               | 125.2               | -66.6                | -40                  | 9.5          | 165.2        | 6.87               | 3.09                |
| 59             | -74.1               | 135.8               | -61                  | -60.1                | 13.1         | 164.1        | 0                  | 8.7                 |
| 60             | -83.1               | 140.5               | -40.7                | -42                  | 42.4         | 177.5        | 0                  | 5.1                 |
| 61             | 107.8               | 141.2               | -72.9                | -38.6                | 179.3        | 179.8        | 0                  | 8.35                |
| 62             | 130.9               | 146.5               | -64.2                | -49.8                | 164.9        | 163.7        | 9.85               | 4.55                |
| 63             | 112.8               | -109.2              | -50.8                | -34.1                | 163.6        | 75.1         | 0                  | 8.7                 |
| 64             | -67.7               | 123.7               | -74.1                | -36.1                | 6.4          | 159.8        | 0                  | 4.93                |
| 65             | 125.5               | -140.4              | -74.2                | -25                  | 160.3        | 115.4        | 0                  | 2.35                |
| 66             | 102.4               | 162.3               | -69.7                | -47.9                | 172.1        | 149.8        | 0                  | 2.12                |
| 67             | -72                 | 149.9               | -58.5                | -39.4                | 13.5         | 170.7        | 0                  | 5.35                |
| 68             | 129.1               | 8.7                 | -63.2                | -45.2                | 167.7        | 53.9         | 0                  | 2.35                |
| 69             | 144                 | 135.6               | -65.9                | -38.4                | 150.1        | 174          | 0                  | 1.03                |
| 70             | 128.8               | 146.2               | -58.1                | -38                  | 173.1        | 175.8        | 0                  | 6.22                |
| 71             | 118.3               | 15.8                | -72.3                | -39                  | 169.4        | 54.8         | 0                  | 3.47                |
| 72             | 141.9               | 155.8               | -58.6                | -44.5                | 159.5        | 159.7        | 0                  | 2.66                |
| 73             | -98.8               | 122.3               | -63.6                | -60.4                | 35.2         | 177.3        | 0                  | 5.48                |
| 74             | 119.9               | -24.6               | -57.7                | -23.4                | 177.6        | 1.2          | 0                  | 4.64                |
| 75             | 94.7                | -135                | -76.8                | -45.1                | 171.5        | 89.9         | 6.48               | 6.22                |
| 76             | -52.6               | -53.3               | -65.8                | -27.4                | 13.2         | 25.9         | 0.44               | 3.47                |
| 77             | -67.3               | -36.6               | -69.9                | -34.3                | 2.6          | 2.3          | 0.6                | 1.88                |
| 78             | -71                 | -35.3               | -75.6                | -36.7                | 4.6          | 1.4          | 1.55               | 5.48                |
| 79             | -58.6               | -40.8               | -60.4                | -37.7                | 1.8          | 3.1          | 0.39               | 4.64                |
| 80             | -69.6               | -37.3               | -68.7                | -43.6                | 0.9          | 6.3          | 6.48               | 3.47                |
| 81             | -63.1               | -43.1               | -58                  | -44.5                | 5.1          | 1.4          | 2.37               | 1.55                |
| 82             | -67.6               | -39.4               | -64.7                | -44.4                | 2.9          | 5            | 2.4                | 2.8                 |
| 83             | -65.4               | -45.4               | -69.2                | -24.3                | 3.8          | 21.1         | 1.55               | 3.34                |
| 84             | -55                 | -43.4               | -71.6                | -50.5                | 16.6         | 7.1          | 0.68               | 2.43                |
| 85             | -76.9               | -35.4               | -52.6                | -52.6                | 24.3         | 17.2         | 2.45               | 6.03                |
| 86             | -70                 | -36                 | -62.5                | -45.5                | 7.5          | 9.5          | 3.68               | 3.39                |
| 87             | -75.2               | -26.3               | -55.6                | -39.5                | 19.6         | 13.2         | 2.4                | 8.35                |
| 88             | -63.4               | -46.8               | -67                  | -63.9                | 3.6          | 17.1         | 1.15               | 5.53                |

(continued)

SUPPLEMENTARY TABLE S1. (CONTINUED)

| <i>Residue</i> | $\phi_{\text{pre}}$ | $\psi_{\text{pre}}$ | $\phi_{\text{post}}$ | $\psi_{\text{post}}$ | $\Delta\phi$ | $\Delta\psi$ | $\Pi_{\text{pre}}$ | $\Pi_{\text{post}}$ |
|----------------|---------------------|---------------------|----------------------|----------------------|--------------|--------------|--------------------|---------------------|
| 89             | -62.5               | -49.7               | -50.1                | -32.4                | 12.4         | 17.3         | 3.27               | 4.05                |
| 90             | -61.6               | -33.5               | -64.9                | -54.1                | 3.3          | 20.6         | 1.28               | 6.03                |
| 91             | -68.3               | -43                 | -61.3                | -36.1                | 7            | 6.9          | 3.68               | 3.39                |
| 92             | -70.3               | -29.1               | -71                  | -40.5                | 0.7          | 11.4         | 3.34               | 8.35                |
| 93             | -71.9               | -36.1               | -66.8                | -37.4                | 5.1          | 1.3          | 0.87               | 5.53                |
| 94             | -61.9               | -48.4               | -57.1                | -39.7                | 4.8          | 8.7          | 3.27               | 4.05                |
| 95             | -56.4               | -51.5               | -56.1                | -55                  | 0.3          | 3.5          | 1.59               | 4.77                |
| 96             | -61.9               | -34.4               | -60.8                | -30.8                | 1.1          | 3.6          | 7.95               | 4.92                |
| 97             | -71.8               | -40.1               | -79                  | -28.9                | 7.2          | 11.2         | 3.34               | 4.12                |
| 98             | -72.4               | -35.8               | -75.1                | -31.1                | 2.7          | 4.7          | 1.89               | 4.68                |
| 99             | -59.9               | -59.1               | -58.8                | -48.8                | 1.1          | 10.3         | 5.2                | 5.58                |
| 100            | -62.7               | -32.4               | -64.6                | -45.9                | 1.9          | 13.5         | 3.17               | 2.43                |
| 101            | -61.2               | -51.5               | -68.2                | -21.1                | 7            | 30.4         | 7.95               | 4.92                |
| 102            | -62.3               | -53.2               | -81.2                | -46.8                | 18.9         | 6.4          | 2.31               | 9.85                |
| 103            | -47.4               | -50.5               | -52.6                | -49.2                | 5.2          | 1.3          | 1.89               | 8.74                |
| 104            | -66.6               | -38.1               | -59.3                | -36.9                | 7.3          | 1.2          | 5.2                | 1.64                |
| 105            | -63.7               | -44.1               | -80.2                | 3.8                  | 16.5         | 47.9         | 3.17               | 2.21                |
| 106            | -69.8               | -37.5               | 67.6                 | 10.3                 | 137.4        | 47.8         | 1.47               | 3.29                |
| 107            | -61.1               | -42.5               | -67.4                | -11.3                | 6.3          | 31.2         | 2.04               | 8.74                |
| 108            | -65.5               | -36.3               | -159.3               | 176.1                | 93.8         | 147.6        | 0.66               | 9.85                |
| 109            | -77                 | -33.8               | -144.2               | 111.8                | 67.2         | 145.6        | 2.01               | 4.23                |
| 110            | -60.7               | -48.8               | -66.7                | 11.5                 | 6            | 60.3         | 2.21               | 0                   |
| 111            | -68.6               | -32.1               | -94.2                | -30.4                | 25.6         | 1.7          | 2.33               | 0                   |
| 112            | -61.4               | -44.4               | -54.9                | 118.5                | 6.5          | 162.9        | 3.76               | 6.86                |
| 113            | -56.1               | -54.3               | -40.2                | -45.6                | 15.9         | 8.7          | 3.6                | 4.23                |
| 114            | -58                 | -39.5               | -63.4                | -45.8                | 5.4          | 6.3          | 2.01               | 6.89                |
| 115            | -59.7               | -52.4               | -74.5                | -37.4                | 14.8         | 15           | 3.29               | 2.8                 |
| 116            | -61.9               | -34.7               | -62.1                | -29.6                | 0.2          | 5.1          | 2.33               | 6.86                |
| 117            | -66.7               | -42.2               | -66.9                | -49.9                | 0.2          | 7.7          | 3.76               | 7.08                |
| 118            | -58.9               | -43.9               | -48.4                | -51.9                | 10.5         | 8            | 3.6                | 3.95                |
| 119            | -57.2               | -51.1               | -59.6                | -45.5                | 2.4          | 5.6          | 2.01               | 6.89                |
| 120            | -63.9               | -36.2               | -67.8                | -10.9                | 3.9          | 25.3         | 3.29               | 2.8                 |
| 121            | -67.2               | -44.2               | -75.4                | -57.8                | 8.2          | 13.6         | 0.94               | 3.18                |
| 122            | -64.4               | -41.4               | -60                  | -41.1                | 4.4          | 0.3          | 0.68               | 6.25                |
| 123            | -58.2               | -47.2               | -56.5                | -30.8                | 1.7          | 16.4         | 1.56               | 7.79                |
| 124            | -63.9               | -34.2               | -81.6                | -21.7                | 17.7         | 12.5         | 4.46               | 3.87                |
| 125            | -67.9               | -40.9               | -76.5                | -45.5                | 8.6          | 4.6          | 0.85               | 6.96                |
| 126            | -73.4               | -9.1                | -67.4                | -57.7                | 6            | 48.6         | 9                  | 3.98                |
| 127            | 40.7                | -124                | -47.6                | -22.5                | 88.3         | 101.5        | 0.65               | 0.68                |
| 128            | -88.8               | 14.3                | -88.4                | -60.6                | 0.4          | 74.9         | 4.46               | 7.79                |
| 129            | -99.4               | -3.7                | -92                  | 36.2                 | 7.4          | 39.9         | 0                  | 0                   |
| 130            | 141.3               | 163.8               | -172.7               | 160                  | 46           | 3.8          | 9                  | 6.96                |
| 131            | 130.4               | 147.8               | -79.4                | 107.2                | 150.2        | 40.6         | 0                  | 5.29                |
| 132            | -75.1               | 131                 | -77.9                | 114.6                | 2.8          | 16.4         | 5.23               | 9.52                |
| 133            | -94.5               | 4.7                 | -63.9                | -40.7                | 30.6         | 45.4         | 0                  | 0                   |
| 134            | 74.8                | 7.6                 | 124.6                | -32.2                | 49.8         | 39.8         | 9.85               | 8.92                |
| 135            | 128.1               | 27.5                | -100.1               | 21                   | 131.8        | 6.5          | 7.83               | 0                   |
| 136            | 86.2                | -2.9                | 88.2                 | 16.4                 | 2            | 19.3         | 9.85               | 6.02                |
| 137            | 106.2               | 132.6               | -111                 | 145.6                | 142.8        | 13           | 0                  | 8.92                |
| 138            | -91.4               | 140.9               | -131                 | 136.5                | 39.6         | 4.4          | 0                  | 4.02                |
| 139            | -93.3               | 113.2               | -96.8                | 109                  | 3.5          | 4.2          | 5.23               | 9.52                |
| 140            | -84.8               | 120.9               | -95.1                | 112.2                | 10.3         | 8.7          | 5.68               | 5.66                |
| 141            | -90.5               | 51.5                | -88.5                | 142.6                | 2            | 91.1         | 0                  | 4.93                |
| 142            | 170.6               | 164.3               | -115.8               | 101.7                | 73.6         | 62.6         | 5.68               | 0                   |

(continued)

SUPPLEMENTARY TABLE S1. (CONTINUED)

| <i>Residue</i> | $\phi_{\text{pre}}$ | $\psi_{\text{pre}}$ | $\phi_{\text{post}}$ | $\psi_{\text{post}}$ | $\Delta\phi$ | $\Delta\psi$ | $\Pi_{\text{pre}}$ | $\Pi_{\text{post}}$ |
|----------------|---------------------|---------------------|----------------------|----------------------|--------------|--------------|--------------------|---------------------|
| 143            | -69.9               | 119.8               | -64.7                | -25.4                | 5.2          | 145.2        | 0                  | 0                   |
| 144            | 127.8               | 91.4                | -113.2               | 106.5                | 119          | 15.1         | 0                  | 0                   |
| 145            | -67.1               | 176.8               | -74.1                | 178.9                | 7            | 2.1          | 7.29               | 2.74                |
| 146            | -61.7               | -24.1               | -63.1                | -29.5                | 1.4          | 5.4          | 2.51               | 4.73                |
| 147            | -79                 | -32.7               | -68.8                | -58.8                | 10.2         | 26.1         | 3.02               | 3.16                |
| 148            | -64                 | -46.9               | -50                  | -51.1                | 14           | 4.2          | 2.73               | 4.41                |
| 149            | -58.8               | -42.1               | -56                  | -29.4                | 2.8          | 12.7         | 4.65               | 0                   |
| 150            | -65.6               | -32.3               | -69                  | -44.5                | 3.4          | 12.2         | 2.64               | 7.01                |
| 151            | -70.6               | -28.5               | -53.2                | -41.7                | 17.4         | 13.2         | 6.14               | 6.4                 |
| 152            | -66.8               | -44.7               | -58.7                | -12.2                | 8.1          | 32.5         | 3.02               | 4.41                |
| 153            | -68.8               | -35.9               | -109.8               | -49                  | 41           | 13.1         | 2.73               | 4.06                |
| 154            | -97.9               | 18.2                | -45.4                | -49.9                | 52.5         | 68.1         | 3.08               | 7.01                |
| 155            | 71.8                | 21                  | 64.5                 | 33.3                 | 7.3          | 12.3         | 1.49               | 3.99                |
| 156            | 114.6               | 18.6                | -95.8                | 136.6                | 149.6        | 118          | 4.62               | 6.4                 |
| 157            | -69.1               | 124.1               | -153.6               | 106.6                | 84.5         | 17.5         | 6.14               | 9.85                |
| 158            | -97.1               | 108.7               | -66.3                | 85.1                 | 30.8         | 23.6         | 4.65               | 0                   |
| 159            | -66.9               | -28.8               | -74.1                | 107.4                | 7.2          | 136.2        | 4.7                | 0                   |
| 160            | -64.3               | -34.9               | -72.4                | 147.9                | 8.1          | 177.2        | 6.99               | 9.85                |
| 161            | -51.1               | -34.8               | -135.8               | 109.8                | 84.7         | 144.6        | 0                  | 0                   |
| 162            | 116.5               | -0.9                | -70.8                | -0.9                 | 172.7        | 0            | 0                  | 0                   |

DSSP files for 2HMG and 1HTM are aligned along their common residues, conformational angles  $\phi_{\text{pre}}, \psi_{\text{pre}}$  pre-fusion and  $\phi_{\text{post}}, \psi_{\text{post}}$  post-fusion are given, and differences  $\Delta\phi$  and  $\Delta\psi$  are computed. The maximum of the  $\Pi$ -values of the two prospective BHBs are reported  $\Pi_{\text{pre}}$  pre- and  $\Pi_{\text{post}}$  post-fusion.
